# Supplementary material
Source: publisher figshare collection journal article supplement (https://acs.figshare.com/ndownloader/files/12909701)
Supplement: Supplementary file 1 [file 12909701]

## Supporting Information

### $\alpha$ -Fe<sub>2</sub>O<sub>3</sub> Nanodisk/Bacterial Cellulose Hybrid Membranes as High-Performance Sulfate-Radical-Based Visible Light Photocatalysts under Stirring/Flowing States

Zhong-Shuai Zhu<sup>a,b</sup>, Jin Qu<sup>a\*</sup>, Shu-Meng Hao<sup>a</sup>, Shuang Han<sup>b</sup>, Kun-Le Jia<sup>b</sup>, and Zhong-Zhen Yu<sup>a,b\*</sup>

<sup>a</sup> State Key Laboratory of Organic-Inorganic Composites, College of Materials Science and Engineering, Beijing University of Chemical Technology, Beijing 100029, China.

<sup>b</sup> Beijing Key Laboratory of Advanced Functional Polymer Composites, Beijing University of Chemical Technology, Beijing 100029, China.

E-mail: [qujin@mail.buct.edu.cn](mailto:qujin@mail.buct.edu.cn) (J. Qu), [yuzz@mail.buct.edu.cn](mailto:yuzz@mail.buct.edu.cn) (Z.-Z. Yu)

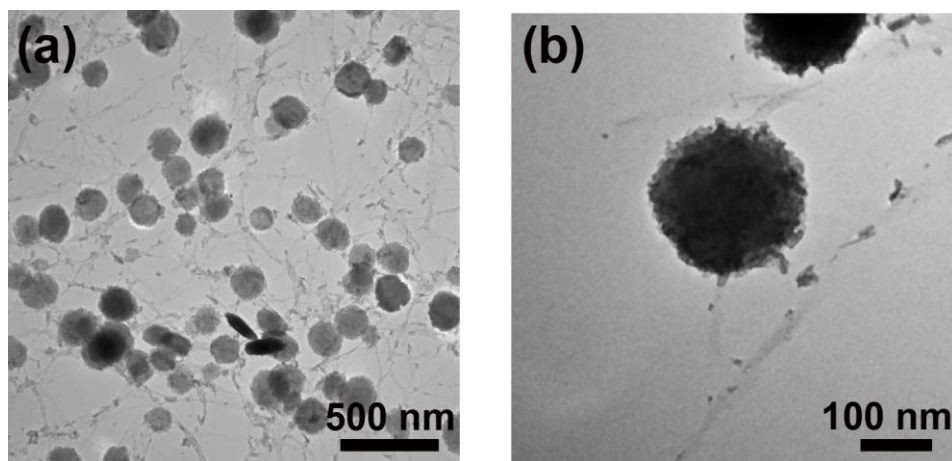

**Figure S1.** (a, b) TEM images of BFO-30.

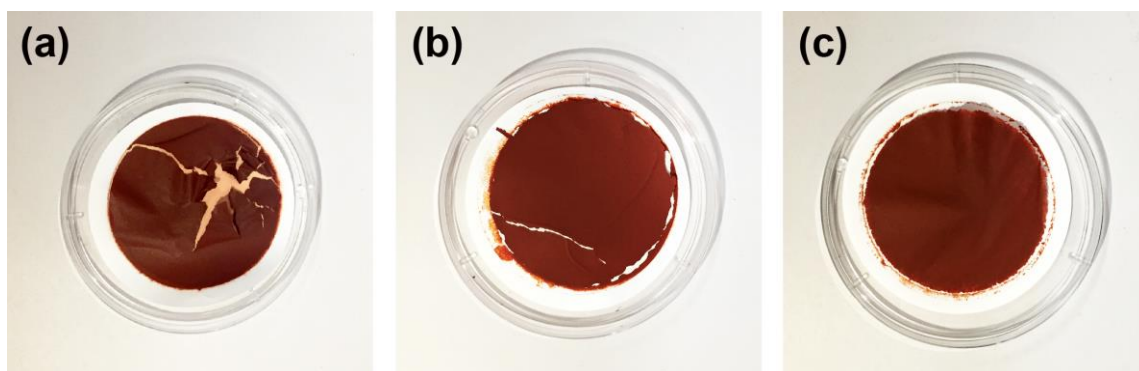

**Figure S2.** Digital photographs of (a) BFO-10, (b) BFO-20, and (c) BFO-40 membranes with the substrates.

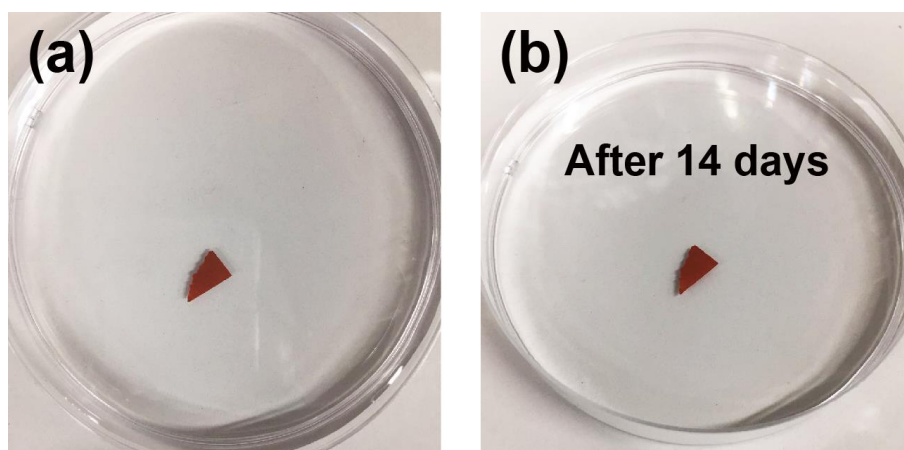

**Figure S3.** Digital photographs of a piece of BFO-30 membrane in water (a) before and (b) after 14 days.

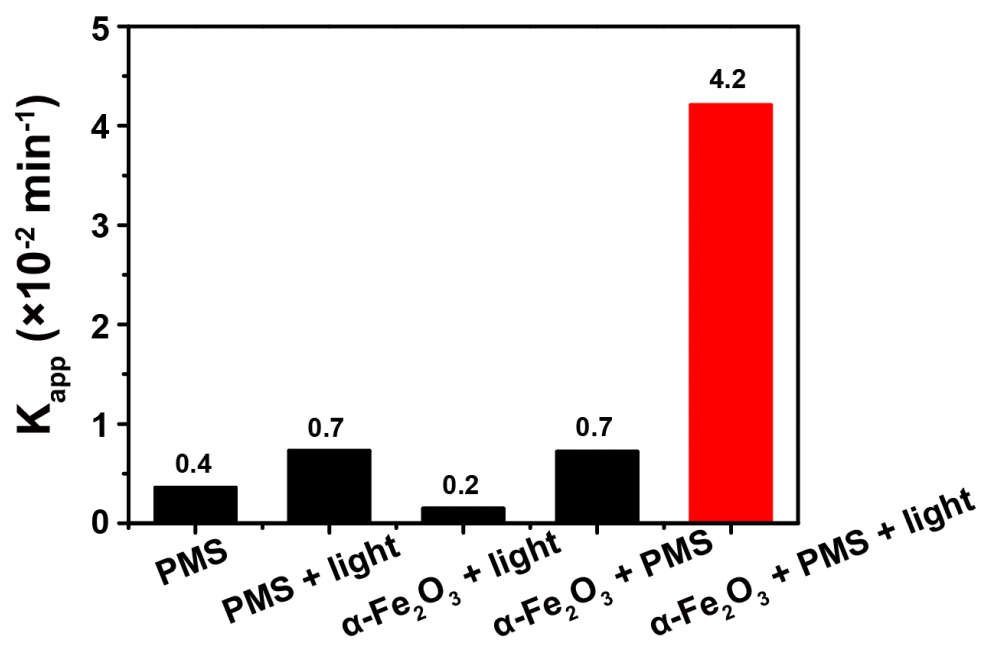

**Figure S4.** The degradation rate constants ( $K_{app}$ ) of RhB under different conditions with or without  $0.2 \text{ g L}^{-1}$  of PMS.

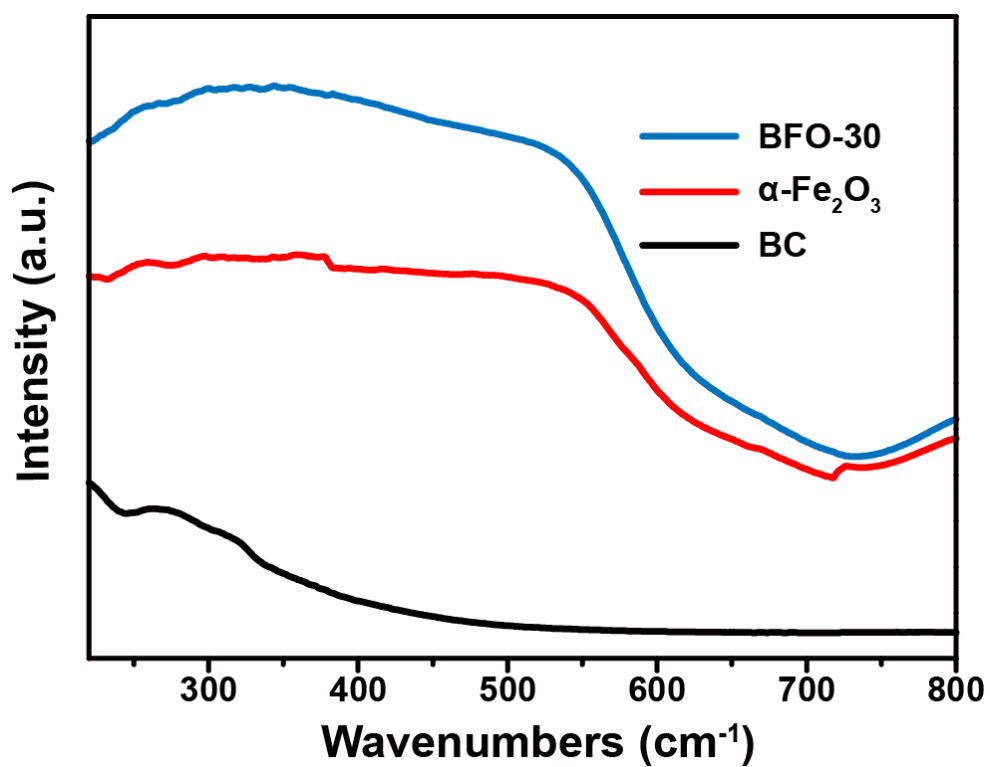

**Figure S5.** UV-vis diffuse reflectance spectra of BC,  $\alpha\text{-Fe}_2\text{O}_3$  and BFO-30.

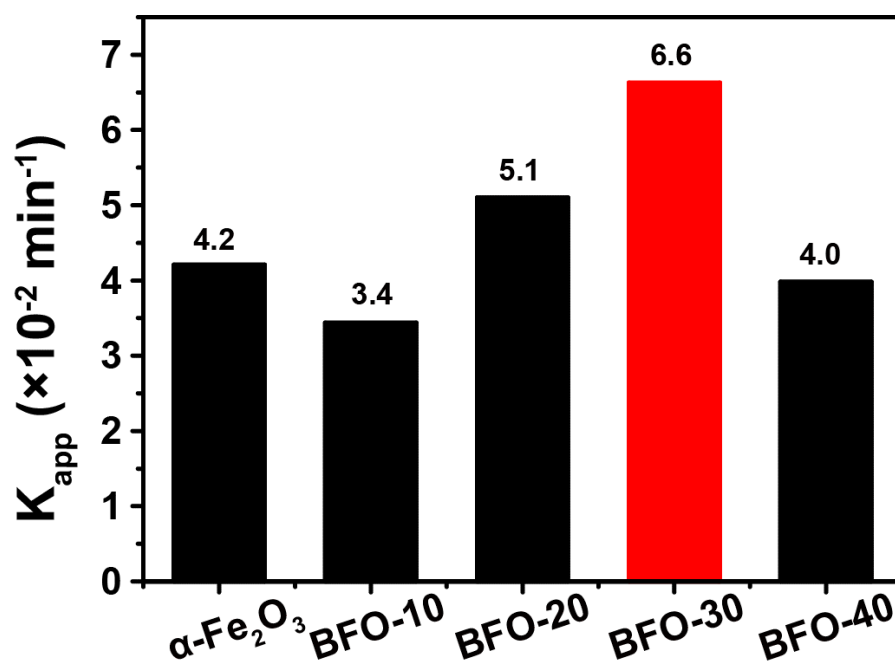

**Figure S6.** Degradation rate constants ( $K_{app}$ ) of RhB using BFOs as catalysts with  $0.2 \text{ g L}^{-1}$  of PMS.

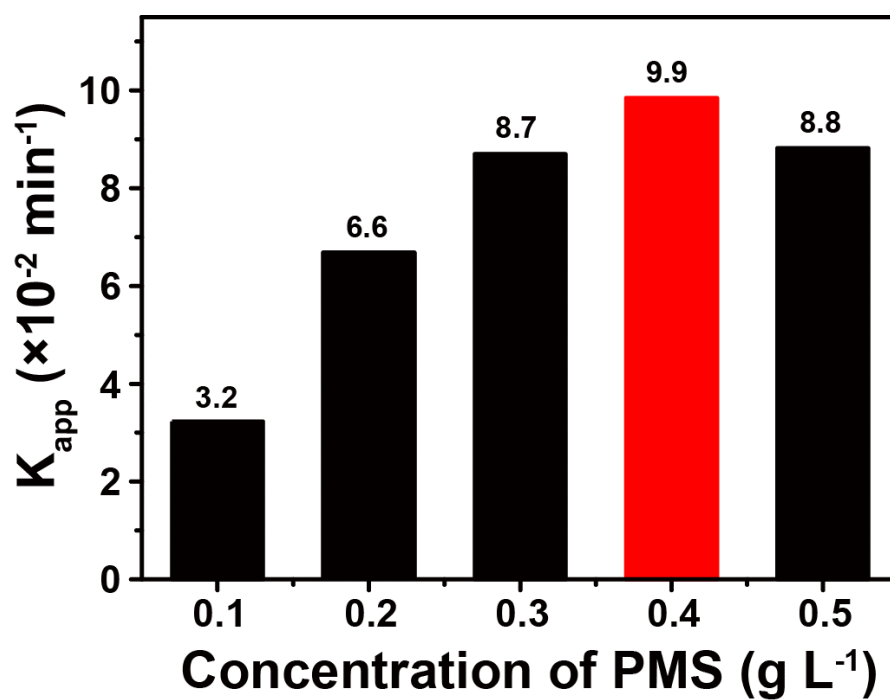

**Figure S7.** Degradation rate constants ( $K_{app}$ ) of RhB using BFO-30 as the catalyst with different amounts of PMS.

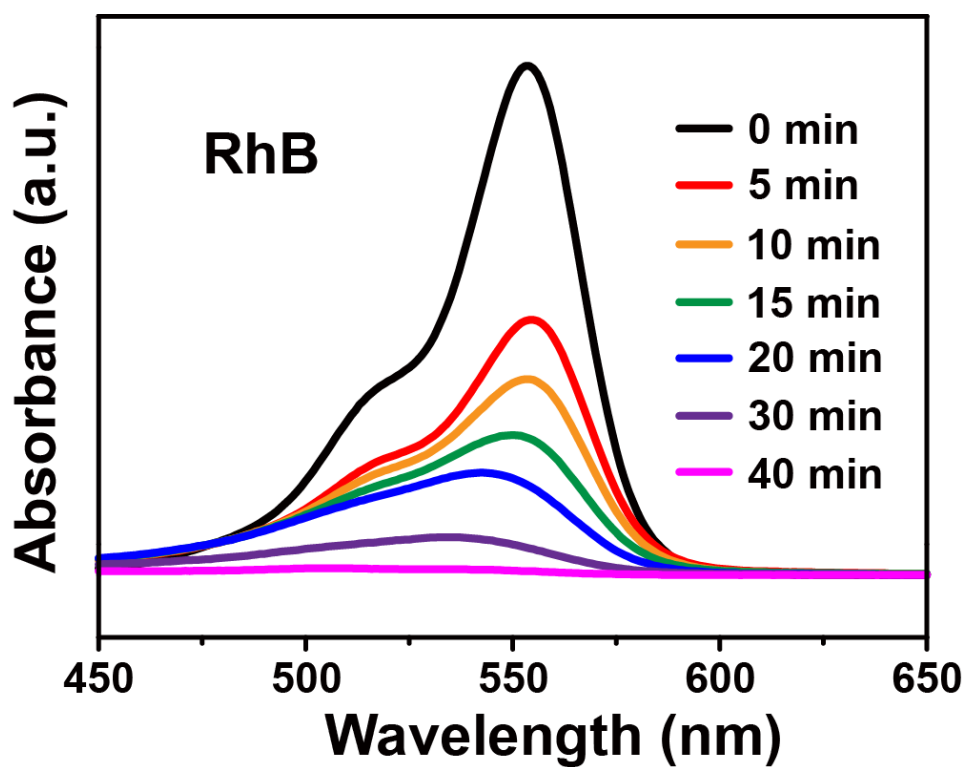

**Figure S8.** UV-vis spectra of RhB using BFO-30 with 0.4 g L<sup>-1</sup> of PMS.

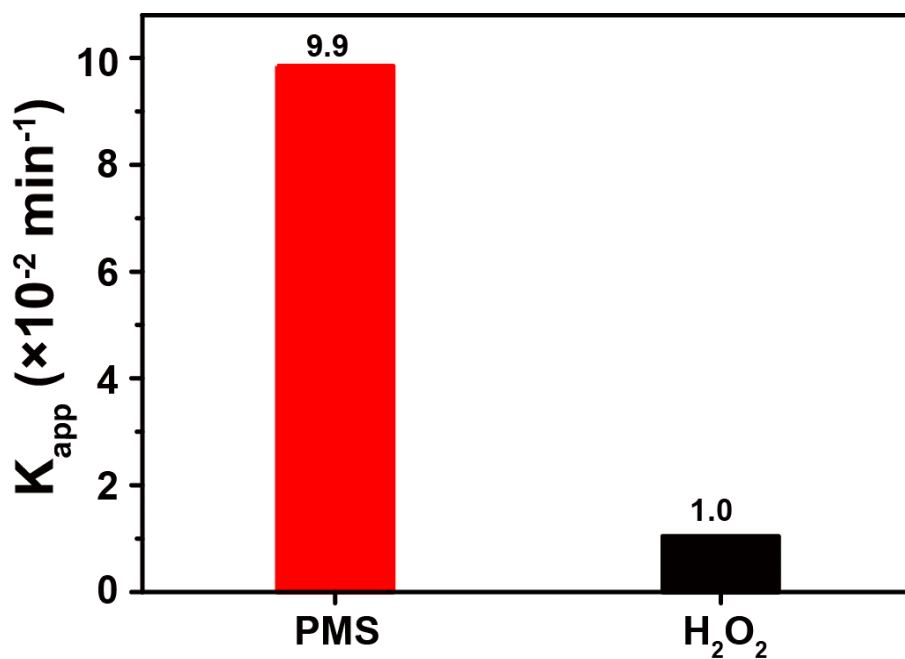

**Figure S9.** Degradation rate constants ( $K_{app}$ ) of RhB using BFO-30 as the catalyst with the same molar amounts of PMS and H<sub>2</sub>O<sub>2</sub>.

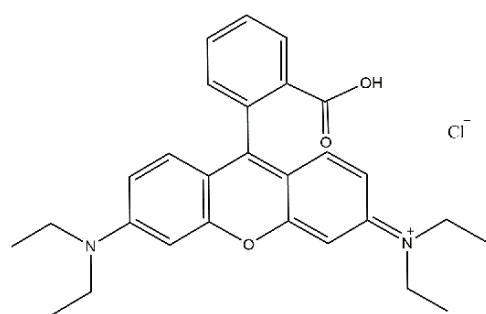

**Rhodamine B**

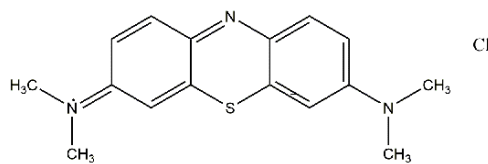

**Methylene blue**

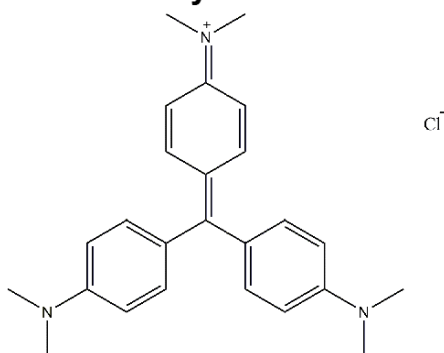

**Crystal violet**

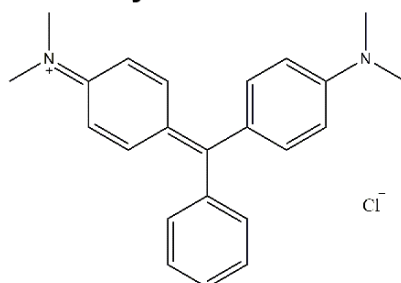

**Malachite green**

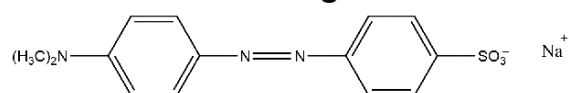

**Methyl orange**

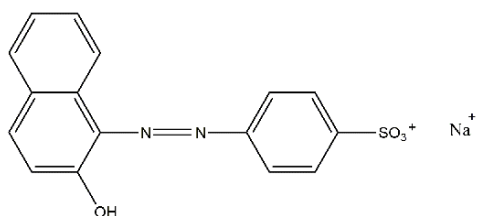

**Orange II**

**Figure S10.** Molecular structures of organic dyes.

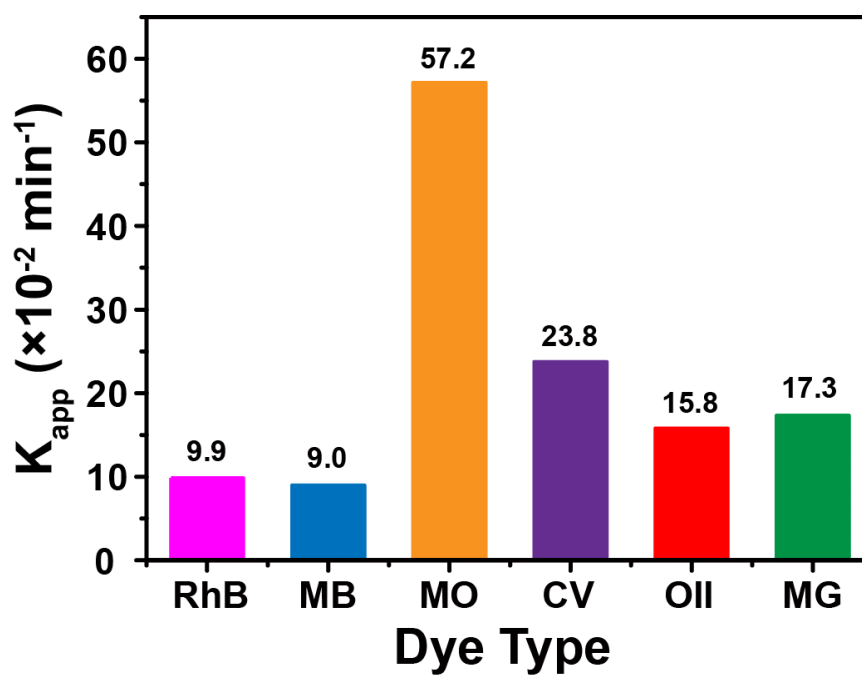

**Figure S11.** Degradation rate constants ( $K_{app}$ ) of different dyes using BFO-30 as the catalyst with  $0.2 \text{ g L}^{-1}$  of PMS.

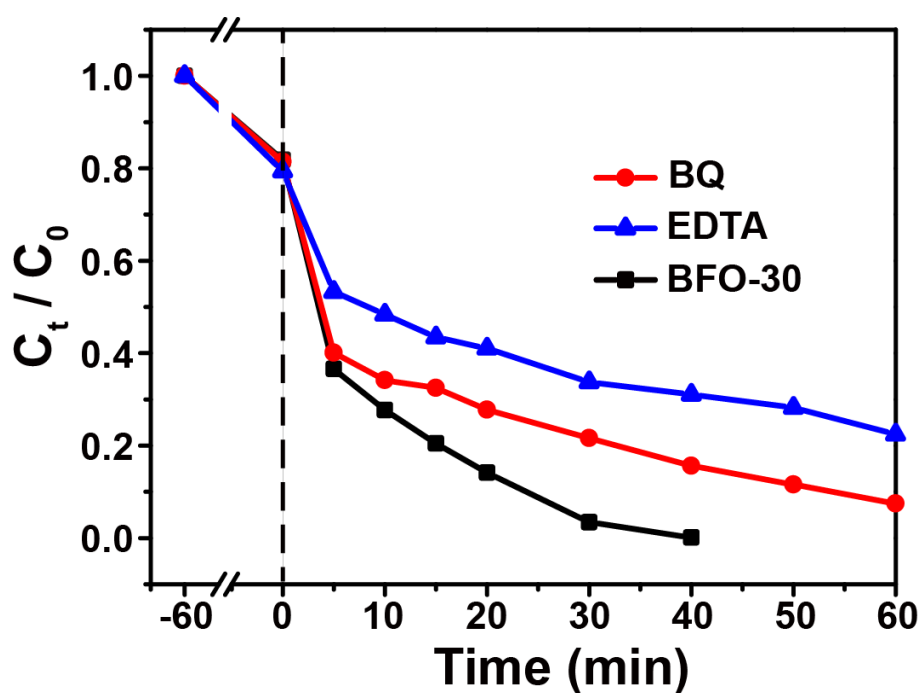

**Figure S12.** Relative concentration ( $C_t/C_0$ ) changes of RhB using BFO-30 with BQ and EDTA (BQ or EDTA:  $10 \text{ mM}$ ; RhB:  $50 \text{ mL } 10 \text{ ppm}$ ; PMS:  $0.4 \text{ g L}^{-1}$ ).

**Table S1.** Photodegradation performances of BFO-30 membrane with different flow rates

| $Q$<br>(mL h <sup>-1</sup> ) | $m_m$<br>(mg) | $t$<br>(h) | $m$<br>(mg) | $D_f$<br>(%) | $Q_t$<br>(10 <sup>-3</sup> h <sup>-1</sup> ) |
|------------------------------|---------------|------------|-------------|--------------|----------------------------------------------|
| 3                            | 7.5           | 84         | 2.52        | 100          | 4.0                                          |
| 6                            | 7.5           | 62         | 3.52        | 93           | 7.6                                          |
| 9                            | 7.5           | 42         | 3.30        | 87           | 10.5                                         |

$Q$ : the flow rate of RhB per hour;  $m_m$ : the mass of BFO-30 membrane;  $t$ : total reaction time;  $m$ : the consumption of RhB caused by 7.5 mg of BFO-30 membrane in the total reaction time;  $D_f$ : the final degradation efficiency until the final reaction time;  $Q_t$ : the consumption of MB caused by 1 mg of BFO-30 membrane per hour.
